# Supplementary material for: A correlation model of UPLC fingerprints and anticoagulant activity for quality assessment of Panax notoginseng by hierarchical clustering analysis and multiple linear regression analysis
Source: Royal Society of Chemistry journal article supplement (doi:10.1039/c4ay02277g), 2015-01-01
Supplement: c4ay02277g1.pdf [file c4ay02277g1.pdf]

**Supplementary table 1** Normalized peak area of each common peak.

| Peak No. | Normalized peak areas of common peaks |         |         |         |         |         |         |         |         |         |         |         |         |         |         | RSD (%) |
|----------|---------------------------------------|---------|---------|---------|---------|---------|---------|---------|---------|---------|---------|---------|---------|---------|---------|---------|
|          | S1                                    | S2      | S3      | S4      | S5      | S6      | S7      | S8      | S9      | S10     | S11     | S12     | S13     | S14     | S15     |         |
| 1        | 10.360                                | 14.016  | 14.435  | 12.998  | 14.905  | 11.421  | 11.780  | 13.207  | 13.394  | 0       | 10.307  | 0       | 17.667  | 0       | 15.108  | 16.07   |
| 2        | 80.268                                | 96.364  | 103.328 | 49.494  | 73.348  | 55.231  | 64.185  | 80.742  | 76.718  | 58.851  | 52.596  | 52.144  | 72.238  | 62.612  | 90.865  | 23.64   |
| 3        | 313.306                               | 393.005 | 442.225 | 306.446 | 382.109 | 267.833 | 268.337 | 313.070 | 291.521 | 291.226 | 261.962 | 266.358 | 390.894 | 329.444 | 312.210 | 17.17   |
| 4        | 19.004                                | 68.628  | 26.225  | 16.915  | 20.992  | 12.649  | 16.645  | 17.898  | 17.702  | 10.311  | 0       | 15.287  | 20.636  | 15.446  | 24.991  | 65.44   |
| 5        | 10.851                                | 24.094  | 15.683  | 0       | 14.186  | 10.240  | 0       | 10.944  | 10.020  | 11.151  | 10.583  | 0       | 14.698  | 10.557  | 10.678  | 31.59   |
| 6        | 188.491                               | 243.590 | 250.326 | 151.803 | 179.479 | 136.635 | 156.839 | 176.601 | 166.156 | 180.193 | 150.682 | 130.356 | 208.951 | 215.218 | 203.621 | 19.82   |
| 7        | 11.935                                | 32.394  | 15.415  | 0       | 13.267  | 0       | 0       | 10.622  | 10.808  | 11.403  | 0       | 0       | 13.064  | 11.355  | 12.083  | 45.92   |
| 8        | 53.895                                | 89.700  | 86.279  | 41.567  | 56.365  | 53.308  | 38.913  | 46.720  | 46.508  | 48.932  | 29.794  | 41.073  | 58.481  | 59.720  | 49.819  | 30.27   |
| 9        | 17.245                                | 19.137  | 15.447  | 18.900  | 21.772  | 0       | 11.156  | 0       | 21.484  | 14.880  | 19.691  | 15.443  | 11.773  | 0       | 13.216  | 21.56   |
| 10       | 0                                     | 20.897  | 25.121  | 11.288  | 23.082  | 12.785  | 18.616  | 18.090  | 24.258  | 27.111  | 24.973  | 0       | 0       | 14.387  | 16.775  | 26.61   |
| 11       | 19.147                                | 19.000  | 19.884  | 23.834  | 24.325  | 20.587  | 20.333  | 26.205  | 26.502  | 32.741  | 26.950  | 20.526  | 19.897  | 49.687  | 22.147  | 31.80   |
| 12       | 13.408                                | 28.998  | 33.230  | 20.053  | 28.566  | 25.987  | 24.735  | 28.001  | 30.031  | 31.865  | 38.895  | 19.774  | 19.955  | 20.708  | 22.240  | 25.43   |
| 13       | 12.070                                | 12.722  | 13.486  | 10.871  | 11.320  | 10.250  | 0       | 0       | 12.975  | 0       | 11.231  | 11.971  | 11.714  | 14.734  | 12.140  | 10.09   |
| 14       | 45.959                                | 40.407  | 42.429  | 32.274  | 27.220  | 21.608  | 23.606  | 24.715  | 30.282  | 13.359  | 17.491  | 41.120  | 46.972  | 44.932  | 36.036  | 33.60   |
